# Supplementary material for: Aura-biomes are present in the water layer above coral reef benthic macro-organisms
Source: PeerJ. 2017 Aug 15;5:e3666. doi: 10.7717/peerj.3666 (PMC5562181; doi:10.7717/peerj.3666)
Supplement: Table S3 — The proportion of sequences in the top 100 genera found in each family in each metagenome, Mb, Mussismilia braziliensis; Fma, fleshy macroalgae; TA, turf algae; Pc, Palythoa caribaeorum and WC, water column. [file peerj-05-3666-s003.docx]

Supplementary Table 3. The proportion of sequences in the top 100 genera found in each family in each metagenome, Co = Coral*,* Fma = fleshy macroalgae, TA = turf algae, Zo = Zoanthidand WC = water column.

| phylum | class | family | genus | Co1 | Co2 | Co3 | Co4 | Fma1 | Fma2 | Fma3 | TA1 | TA2 | TA3 | Zo1 | Zo2 | WC1 | WC2 | WC3 | WC4 |
| --- | --- | --- | --- | --- | --- | --- | --- | --- | --- | --- | --- | --- | --- | --- | --- | --- | --- | --- | --- |
| Acidobacteria | Solibacteres | Solibacteraceae | Candidatus Solibacter | 0.10 | 0.09 | 0.08 | 0.28 | 0.09 | 0.29 | 0.61 | 1.05 | 0.11 | 0.31 | 0.11 | 0.04 | 0.08 | 0.16 | 0.10 | 0.37 |
| unclassified (derived from Acidobacteria) | unclassified (derived from Acidobacteria) | Candidatus Koribacter | 0.06 | 0.06 | 0.04 | 0.10 | 0.05 | 0.14 | 0.25 | 0.36 | 0.05 | 0.12 | 0.06 | 0.04 | 0.05 | 0.07 | 0.06 | 0.15 |
| Actinobacteria | Actinobacteria (class) | Acidothermaceae | Acidothermus | 0.02 | 0.03 | 0.02 | 0.06 | 0.02 | 0.06 | 0.06 | 0.13 | 0.02 | 0.04 | 0.01 | 0.02 | 0.02 | 0.03 | 0.03 | 0.04 |
| Bifidobacteriaceae | Bifidobacterium | 0.01 | 0.02 | 0.02 | 0.04 | 0.02 | 0.02 | 0.03 | 0.03 | 0.01 | 0.02 | 0.02 | 0.01 | 0.02 | 0.02 | 0.03 | 0.02 |
| Brevibacteriaceae | Brevibacterium | 0.01 | 0.01 | 0.02 | 0.06 | 0.02 | 0.03 | 0.03 | 0.03 | 0.01 | 0.02 | 0.01 | 0.02 | 0.01 | 0.02 | 0.02 | 0.02 |
| Catenulisporaceae | Catenulispora | 0.03 | 0.03 | 0.03 | 0.09 | 0.03 | 0.07 | 0.10 | 0.13 | 0.04 | 0.06 | 0.05 | 0.04 | 0.03 | 0.04 | 0.04 | 0.06 |
| Cellulomonadaceae | Cellulomonas | 0.01 | 0.01 | 0.01 | 0.06 | 0.01 | 0.03 | 0.03 | 0.06 | 0.01 | 0.02 | 0.01 | 0.01 | 0.01 | 0.01 | 0.02 | 0.02 |
| Conexibacteraceae | Conexibacter | 0.04 | 0.03 | 0.04 | 0.10 | 0.04 | 0.07 | 0.14 | 0.17 | 0.03 | 0.07 | 0.05 | 0.03 | 0.03 | 0.05 | 0.06 | 0.08 |
| Coriobacteriaceae | Atopobium | 0.00 | 0.01 | 0.00 | 0.01 | 0.01 | 0.01 | 0.01 | 0.01 | 0.01 | 0.01 | 0.01 | 0.00 | 0.00 | 0.01 | 0.00 | 0.01 |
| Cryptobacterium | 0.01 | 0.00 | 0.01 | 0.01 | 0.00 | 0.01 | 0.01 | 0.01 | 0.00 | 0.01 | 0.01 | 0.00 | 0.01 | 0.01 | 0.01 | 0.01 |
| Eggerthella | 0.01 | 0.01 | 0.01 | 0.02 | 0.01 | 0.02 | 0.02 | 0.02 | 0.01 | 0.01 | 0.01 | 0.01 | 0.01 | 0.01 | 0.01 | 0.01 |
| Slackia | 0.01 | 0.01 | 0.01 | 0.02 | 0.01 | 0.03 | 0.02 | 0.01 | 0.01 | 0.02 | 0.01 | 0.01 | 0.01 | 0.01 | 0.01 | 0.01 |
| Corynebacteriaceae | Corynebacterium | 0.04 | 0.05 | 0.04 | 0.15 | 0.06 | 0.07 | 0.07 | 0.09 | 0.04 | 0.05 | 0.05 | 0.04 | 0.04 | 0.05 | 0.06 | 0.06 |
| Dermabacteraceae | Brachybacterium | 0.01 | 0.01 | 0.01 | 0.06 | 0.01 | 0.02 | 0.03 | 0.04 | 0.01 | 0.01 | 0.01 | 0.02 | 0.01 | 0.02 | 0.02 | 0.01 |
| Dermacoccaceae | Kytococcus | 0.01 | 0.01 | 0.01 | 0.04 | 0.01 | 0.02 | 0.02 | 0.04 | 0.01 | 0.02 | 0.01 | 0.01 | 0.01 | 0.02 | 0.02 | 0.01 |
| Frankiaceae | Frankia | 0.08 | 0.09 | 0.08 | 0.26 | 0.08 | 0.24 | 0.29 | 0.41 | 0.09 | 0.18 | 0.08 | 0.05 | 0.07 | 0.12 | 0.12 | 0.18 |
| Geodermatophilaceae | Geodermatophilus | 0.02 | 0.02 | 0.03 | 0.12 | 0.03 | 0.07 | 0.07 | 0.12 | 0.03 | 0.06 | 0.03 | 0.01 | 0.02 | 0.04 | 0.02 | 0.05 |
| Glycomycetaceae | Stackebrandtia | 0.02 | 0.02 | 0.02 | 0.03 | 0.02 | 0.05 | 0.06 | 0.10 | 0.02 | 0.04 | 0.03 | 0.01 | 0.02 | 0.04 | 0.02 | 0.04 |
| Gordoniaceae | Gordonia | 0.02 | 0.01 | 0.02 | 0.07 | 0.02 | 0.04 | 0.05 | 0.05 | 0.02 | 0.03 | 0.03 | 0.02 | 0.01 | 0.03 | 0.03 | 0.03 |
| Intrasporangiaceae | Janibacter | 0.02 | 0.02 | 0.02 | 0.07 | 0.02 | 0.05 | 0.05 | 0.06 | 0.02 | 0.03 | 0.02 | 0.01 | 0.02 | 0.02 | 0.03 | 0.03 |
| Jonesiaceae | Jonesia | 0.01 | 0.01 | 0.01 | 0.03 | 0.01 | 0.01 | 0.02 | 0.02 | 0.01 | 0.01 | 0.01 | 0.01 | 0.01 | 0.01 | 0.01 | 0.01 |
| Kineosporiaceae | Kineococcus | 0.01 | 0.01 | 0.01 | 0.09 | 0.01 | 0.03 | 0.04 | 0.07 | 0.01 | 0.03 | 0.02 | 0.01 | 0.01 | 0.02 | 0.03 | 0.03 |
| Microbacteriaceae | Clavibacter | 0.01 | 0.01 | 0.01 | 0.02 | 0.01 | 0.03 | 0.02 | 0.04 | 0.01 | 0.01 | 0.01 | 0.00 | 0.01 | 0.01 | 0.02 | 0.01 |
| Leifsonia | 0.01 | 0.01 | 0.01 | 0.03 | 0.00 | 0.01 | 0.02 | 0.03 | 0.01 | 0.01 | 0.01 | 0.01 | 0.01 | 0.00 | 0.01 | 0.01 |
| Micrococcaceae | Arthrobacter | 0.00 | 0.00 | 0.00 | 0.01 | 0.00 | 0.00 | 0.00 | 0.01 | 0.00 | 0.00 | 0.00 | 0.00 | 0.00 | 0.00 | 0.00 | 0.00 |
| Kocuria | 0.01 | 0.01 | 0.01 | 0.15 | 0.01 | 0.02 | 0.02 | 0.04 | 0.01 | 0.02 | 0.01 | 0.01 | 0.01 | 0.01 | 0.02 | 0.01 |
| Renibacterium | 0.01 | 0.01 | 0.01 | 0.03 | 0.01 | 0.02 | 0.02 | 0.02 | 0.01 | 0.01 | 0.01 | 0.01 | 0.01 | 0.01 | 0.02 | 0.01 |
| Micromonosporaceae | Salinispora | 0.05 | 0.06 | 0.06 | 0.13 | 0.04 | 0.11 | 0.14 | 0.20 | 0.05 | 0.08 | 0.04 | 0.03 | 0.06 | 0.07 | 0.07 | 0.09 |
| Mycobacteriaceae | Mycobacterium | 0.15 | 0.15 | 0.13 | 0.43 | 0.18 | 0.45 | 0.57 | 0.66 | 0.16 | 0.29 | 0.23 | 0.19 | 0.14 | 0.17 | 0.21 | 0.34 |
| Nakamurellaceae | Nakamurella | 0.02 | 0.02 | 0.02 | 0.10 | 0.02 | 0.05 | 0.06 | 0.10 | 0.02 | 0.04 | 0.03 | 0.02 | 0.02 | 0.02 | 0.02 | 0.04 |
| Nocardiaceae | Nocardia | 0.03 | 0.03 | 0.03 | 0.07 | 0.02 | 0.08 | 0.08 | 0.10 | 0.03 | 0.05 | 0.03 | 0.02 | 0.03 | 0.04 | 0.02 | 0.05 |
| Rhodococcus | 0.04 | 0.04 | 0.04 | 0.12 | 0.04 | 0.09 | 0.13 | 0.16 | 0.05 | 0.09 | 0.04 | 0.02 | 0.04 | 0.04 | 0.06 | 0.09 |
| Nocardioidaceae | Kribbella | 0.02 | 0.03 | 0.03 | 0.11 | 0.04 | 0.07 | 0.08 | 0.12 | 0.03 | 0.05 | 0.03 | 0.02 | 0.03 | 0.04 | 0.04 | 0.05 |
| Nocardioides | 0.03 | 0.03 | 0.03 | 0.16 | 0.04 | 0.09 | 0.12 | 0.17 | 0.03 | 0.08 | 0.03 | 0.01 | 0.03 | 0.04 | 0.05 | 0.08 |
| Nocardiopsaceae | Nocardiopsis | 0.02 | 0.02 | 0.02 | 0.06 | 0.03 | 0.05 | 0.05 | 0.08 | 0.02 | 0.04 | 0.03 | 0.02 | 0.02 | 0.03 | 0.02 | 0.03 |
|  | Thermobifida | 0.02 | 0.03 | 0.02 | 0.05 | 0.02 | 0.04 | 0.06 | 0.11 | 0.02 | 0.05 | 0.02 | 0.01 | 0.02 | 0.04 | 0.04 | 0.05 |
| Promicromonosporaceae | Xylanimonas | 0.01 | 0.01 | 0.01 | 0.02 | 0.01 | 0.02 | 0.02 | 0.04 | 0.01 | 0.02 | 0.01 | 0.00 | 0.01 | 0.02 | 0.01 | 0.01 |
| Propionibacteriaceae | Propionibacterium | 0.03 | 0.02 | 0.02 | 0.09 | 0.01 | 0.02 | 0.02 | 0.03 | 0.01 | 0.02 | 0.02 | 0.03 | 0.01 | 0.02 | 0.06 | 0.02 |
| Pseudonocardiaceae | Actinosynnema | 0.02 | 0.02 | 0.02 | 0.07 | 0.03 | 0.05 | 0.06 | 0.09 | 0.02 | 0.04 | 0.02 | 0.01 | 0.02 | 0.04 | 0.03 | 0.04 |
| Saccharomonospora | 0.02 | 0.02 | 0.02 | 0.05 | 0.03 | 0.05 | 0.06 | 0.07 | 0.02 | 0.03 | 0.02 | 0.02 | 0.02 | 0.02 | 0.03 | 0.04 |
| Saccharopolyspora | 0.03 | 0.03 | 0.02 | 0.08 | 0.03 | 0.06 | 0.09 | 0.13 | 0.03 | 0.06 | 0.02 | 0.02 | 0.03 | 0.04 | 0.05 | 0.06 |
| Thermobispora | 0.02 | 0.03 | 0.02 | 0.07 | 0.03 | 0.06 | 0.07 | 0.10 | 0.02 | 0.04 | 0.04 | 0.02 | 0.03 | 0.04 | 0.04 | 0.04 |
| Rubrobacteraceae | Rubrobacter | 0.04 | 0.05 | 0.03 | 0.14 | 0.04 | 0.08 | 0.12 | 0.21 | 0.04 | 0.08 | 0.04 | 0.04 | 0.05 | 0.04 | 0.07 | 0.09 |
| Streptomycetaceae | Streptomyces | 0.10 | 0.11 | 0.09 | 0.29 | 0.10 | 0.21 | 0.30 | 0.44 | 0.10 | 0.19 | 0.11 | 0.08 | 0.09 | 0.12 | 0.15 | 0.19 |
| Streptosporangiaceae | Streptosporangium | 0.03 | 0.03 | 0.03 | 0.09 | 0.04 | 0.09 | 0.13 | 0.18 | 0.04 | 0.08 | 0.04 | 0.03 | 0.03 | 0.04 | 0.06 | 0.07 |
| Thermomonosporaceae | Thermomonospora | 0.04 | 0.03 | 0.04 | 0.10 | 0.03 | 0.10 | 0.11 | 0.13 | 0.03 | 0.07 | 0.03 | 0.03 | 0.03 | 0.05 | 0.06 | 0.07 |
| Tsukamurellaceae | Tsukamurella | 0.01 | 0.01 | 0.01 | 0.05 | 0.02 | 0.04 | 0.04 | 0.04 | 0.01 | 0.02 | 0.03 | 0.01 | 0.01 | 0.01 | 0.02 | 0.02 |
| unclassified (derived from Actinobacteria (class)) | unclassified (derived from Actinobacteria (class)) | 0.01 | 0.01 | 0.02 | 0.02 | 0.02 | 0.02 | 0.02 | 0.03 | 0.01 | 0.02 | 0.02 | 0.01 | 0.01 | 0.02 | 0.03 | 0.02 |
| unclassified (derived from Actinomycetales) | Tropheryma | 0.00 | 0.01 | 0.01 | 0.01 | 0.01 | 0.01 | 0.00 | 0.00 | 0.00 | 0.00 | 0.00 | 0.00 | 0.00 | 0.00 | 0.01 | 0.00 |
| Aquificae | Aquificae (class) | Aquificaceae | Aquifex | 0.03 | 0.04 | 0.03 | 0.02 | 0.03 | 0.02 | 0.05 | 0.06 | 0.02 | 0.03 | 0.02 | 0.01 | 0.03 | 0.02 | 0.02 | 0.03 |
| Hydrogenobaculum | 0.01 | 0.01 | 0.01 | 0.00 | 0.01 | 0.01 | 0.01 | 0.01 | 0.01 | 0.01 | 0.01 | 0.01 | 0.01 | 0.01 | 0.01 | 0.01 |
| Hydrogenothermaceae | Sulfurihydrogenibium | 0.02 | 0.03 | 0.03 | 0.03 | 0.03 | 0.02 | 0.03 | 0.04 | 0.01 | 0.02 | 0.02 | 0.02 | 0.02 | 0.03 | 0.02 | 0.02 |
| Bacteroidetes | Bacteroidia | Bacteroidaceae | Bacteroides | 0.21 | 0.25 | 0.25 | 0.38 | 0.20 | 0.43 | 0.43 | 0.46 | 0.22 | 0.38 | 0.21 | 0.12 | 0.25 | 0.24 | 0.34 | 0.32 |
| Porphyromonadaceae | Parabacteroides | 0.10 | 0.12 | 0.11 | 0.13 | 0.10 | 0.21 | 0.23 | 0.28 | 0.11 | 0.21 | 0.10 | 0.05 | 0.13 | 0.13 | 0.15 | 0.17 |
| Porphyromonas | 0.06 | 0.07 | 0.07 | 0.07 | 0.06 | 0.10 | 0.11 | 0.10 | 0.07 | 0.10 | 0.06 | 0.03 | 0.08 | 0.07 | 0.09 | 0.09 |
| Cytophagia | Cytophagaceae | Cytophaga | 0.27 | 0.32 | 0.31 | 0.21 | 0.27 | 0.59 | 0.81 | 0.61 | 0.30 | 0.66 | 0.22 | 0.12 | 0.33 | 0.37 | 0.38 | 0.49 |
| Dyadobacter | 0.19 | 0.19 | 0.18 | 0.29 | 0.20 | 0.47 | 0.54 | 0.56 | 0.20 | 0.43 | 0.19 | 0.08 | 0.20 | 0.25 | 0.33 | 0.33 |
| Spirosoma | 0.23 | 0.22 | 0.22 | 0.38 | 0.23 | 0.55 | 0.67 | 0.61 | 0.23 | 0.49 | 0.24 | 0.13 | 0.23 | 0.29 | 0.32 | 0.39 |
| Flavobacteriia | Flavobacteriaceae | Capnocytophaga | 0.00 | 0.00 | 0.00 | 0.00 | 0.00 | 0.00 | 0.00 | 0.00 | 0.00 | 0.00 | 0.00 | 0.00 | 0.00 | 0.00 | 0.00 | 0.00 |
| Croceibacter | 0.77 | 0.75 | 0.90 | 1.07 | 0.72 | 1.07 | 0.81 | 0.74 | 0.72 | 1.08 | 0.72 | 0.31 | 0.82 | 0.78 | 1.39 | 0.66 |
| Dokdonia | 0.49 | 0.52 | 0.63 | 0.86 | 0.49 | 0.89 | 0.69 | 0.61 | 0.54 | 0.82 | 0.52 | 0.24 | 0.59 | 0.58 | 0.97 | 0.51 |
| Flavobacterium | 0.55 | 0.71 | 0.79 | 0.82 | 0.55 | 0.65 | 0.58 | 0.50 | 0.60 | 0.80 | 0.43 | 0.21 | 0.69 | 0.59 | 0.97 | 0.52 |
| Gramella | 1.78 | 1.78 | 2.03 | 2.02 | 1.44 | 1.84 | 1.69 | 1.45 | 1.61 | 2.34 | 1.27 | 0.58 | 1.86 | 1.56 | 2.80 | 1.46 |
| Leeuwenhoekiella | 0.59 | 0.58 | 0.69 | 0.98 | 0.53 | 0.93 | 0.64 | 0.55 | 0.54 | 1.10 | 0.60 | 0.25 | 0.60 | 0.65 | 1.27 | 0.51 |
| Maribacter | 1.12 | 1.19 | 1.42 | 1.94 | 1.14 | 1.82 | 1.49 | 1.31 | 1.17 | 1.70 | 1.11 | 0.53 | 1.28 | 1.42 | 2.43 | 1.10 |
| Polaribacter | 0.94 | 0.96 | 1.18 | 1.89 | 0.90 | 1.62 | 1.20 | 0.99 | 0.92 | 1.36 | 1.14 | 0.40 | 1.49 | 1.13 | 1.85 | 0.94 |
| Riemerella | 0.00 | 0.00 | 0.00 | 0.00 | 0.00 | 0.00 | 0.00 | 0.00 | 0.00 | 0.00 | 0.00 | 0.00 | 0.00 | 0.00 | 0.00 | 0.00 |
| Robiginitalea | 0.73 | 0.80 | 0.95 | 1.34 | 0.74 | 1.27 | 0.94 | 0.80 | 0.76 | 1.13 | 0.74 | 0.36 | 0.86 | 0.88 | 1.57 | 0.76 |
| Sphingobacteriia | Sphingobacteriaceae | Pedobacter | 0.20 | 0.23 | 0.24 | 0.24 | 0.24 | 0.50 | 0.51 | 0.43 | 0.22 | 0.39 | 0.21 | 0.11 | 0.22 | 0.27 | 0.39 | 0.33 |
| unclassified (derived from Sphingobacteriales) | Chitinophaga | 0.22 | 0.21 | 0.21 | 0.25 | 0.23 | 0.45 | 0.57 | 0.45 | 0.21 | 0.43 | 0.19 | 0.09 | 0.22 | 0.29 | 0.34 | 0.34 |
| unclassified (derived from Bacteroidetes) | Rhodothermaceae | Rhodothermus | 0.09 | 0.10 | 0.08 | 0.16 | 0.10 | 0.23 | 0.37 | 0.41 | 0.10 | 0.21 | 0.10 | 0.06 | 0.10 | 0.13 | 0.10 | 0.23 |
| Salinibacter | 0.07 | 0.07 | 0.05 | 0.12 | 0.06 | 0.12 | 0.22 | 0.24 | 0.07 | 0.13 | 0.05 | 0.04 | 0.07 | 0.08 | 0.08 | 0.14 |
| Chlamydiae | Chlamydiia | Chlamydiaceae | Chlamydia | 0.01 | 0.01 | 0.01 | 0.02 | 0.02 | 0.03 | 0.03 | 0.06 | 0.01 | 0.02 | 0.01 | 0.01 | 0.02 | 0.02 | 0.02 | 0.02 |
| Chlamydophila | 0.01 | 0.01 | 0.01 | 0.01 | 0.01 | 0.01 | 0.02 | 0.03 | 0.01 | 0.01 | 0.01 | 0.01 | 0.01 | 0.01 | 0.00 | 0.01 |
| Parachlamydiaceae | Candidatus Protochlamydia | 0.05 | 0.04 | 0.04 | 0.06 | 0.06 | 0.08 | 0.10 | 0.18 | 0.04 | 0.07 | 0.05 | 0.03 | 0.05 | 0.05 | 0.03 | 0.07 |
| Chlorobi | Chlorobia | Chlorobiaceae | Chlorobaculum | 0.03 | 0.04 | 0.03 | 0.06 | 0.04 | 0.06 | 0.08 | 0.10 | 0.03 | 0.06 | 0.03 | 0.03 | 0.04 | 0.05 | 0.05 | 0.05 |
| Chlorobium | 0.10 | 0.13 | 0.11 | 0.16 | 0.13 | 0.22 | 0.25 | 0.31 | 0.10 | 0.19 | 0.11 | 0.07 | 0.11 | 0.12 | 0.13 | 0.17 |
| Chloroherpeton | 0.04 | 0.05 | 0.04 | 0.07 | 0.05 | 0.08 | 0.13 | 0.14 | 0.04 | 0.08 | 0.04 | 0.05 | 0.04 | 0.07 | 0.05 | 0.08 |
| Pelodictyon | 0.04 | 0.04 | 0.03 | 0.05 | 0.03 | 0.05 | 0.09 | 0.10 | 0.03 | 0.06 | 0.04 | 0.02 | 0.03 | 0.05 | 0.05 | 0.05 |
| Prosthecochloris | 0.00 | 0.00 | 0.00 | 0.00 | 0.00 | 0.00 | 0.00 | 0.00 | 0.00 | 0.00 | 0.00 | 0.00 | 0.00 | 0.00 | 0.00 | 0.00 |
| Chloroflexi | Chloroflexi (class) | Chloroflexaceae | Chloroflexus | 0.06 | 0.06 | 0.05 | 0.13 | 0.06 | 0.14 | 0.18 | 0.27 | 0.05 | 0.12 | 0.05 | 0.04 | 0.06 | 0.07 | 0.07 | 0.11 |
| Roseiflexus | 0.06 | 0.05 | 0.04 | 0.11 | 0.06 | 0.10 | 0.17 | 0.27 | 0.05 | 0.10 | 0.05 | 0.03 | 0.05 | 0.06 | 0.05 | 0.12 |
| Herpetosiphonaceae | Herpetosiphon | 0.04 | 0.04 | 0.04 | 0.13 | 0.05 | 0.12 | 0.13 | 0.17 | 0.05 | 0.09 | 0.06 | 0.06 | 0.05 | 0.07 | 0.06 | 0.09 |
| Dehalococcoidetes | unclassified (derived from Dehalococcoidetes) | Dehalococcoides | 0.02 | 0.02 | 0.02 | 0.03 | 0.03 | 0.03 | 0.04 | 0.06 | 0.02 | 0.03 | 0.03 | 0.00 | 0.02 | 0.02 | 0.03 | 0.03 |
| Thermomicrobia (class) | Sphaerobacteraceae | Sphaerobacter | 0.04 | 0.04 | 0.04 | 0.09 | 0.04 | 0.10 | 0.15 | 0.19 | 0.04 | 0.08 | 0.03 | 0.03 | 0.04 | 0.07 | 0.08 | 0.08 |
| Thermomicrobiaceae | Thermomicrobium | 0.00 | 0.01 | 0.01 | 0.02 | 0.01 | 0.01 | 0.02 | 0.03 | 0.01 | 0.01 | 0.00 | 0.01 | 0.01 | 0.01 | 0.01 | 0.01 |
| Cyanobacteria | Gloeobacteria | unclassified (derived from Gloeobacterales) | Gloeobacter | 0.05 | 0.05 | 0.03 | 0.09 | 0.04 | 0.10 | 0.13 | 0.20 | 0.04 | 0.09 | 0.05 | 0.03 | 0.05 | 0.06 | 0.06 | 0.10 |
| unclassified (derived from Cyanobacteria) | Nostocaceae | Anabaena | 0.06 | 0.07 | 0.05 | 0.16 | 0.06 | 0.18 | 0.14 | 0.19 | 0.06 | 0.13 | 0.09 | 0.04 | 0.06 | 0.07 | 0.08 | 0.11 |
| Nostoc | 0.13 | 0.14 | 0.09 | 0.33 | 0.11 | 0.31 | 0.26 | 0.36 | 0.12 | 0.23 | 0.19 | 0.12 | 0.11 | 0.15 | 0.16 | 0.19 |
| Prochlorococcaceae | Prochlorococcus | 0.24 | 0.38 | 0.37 | 0.64 | 0.32 | 0.31 | 0.22 | 0.19 | 0.25 | 0.28 | 0.24 | 0.21 | 0.26 | 0.38 | 0.73 | 0.30 |
| unclassified (derived from Chroococcales) | Acaryochloris | 0.01 | 0.01 | 0.01 | 0.03 | 0.01 | 0.04 | 0.04 | 0.05 | 0.02 | 0.03 | 0.02 | 0.01 | 0.01 | 0.02 | 0.01 | 0.02 |
| Crocosphaera | 0.03 | 0.03 | 0.03 | 0.08 | 0.04 | 0.05 | 0.06 | 0.08 | 0.03 | 0.05 | 0.05 | 0.03 | 0.03 | 0.04 | 0.03 | 0.04 |
| Cyanothece | 0.04 | 0.04 | 0.04 | 0.12 | 0.04 | 0.09 | 0.10 | 0.12 | 0.04 | 0.07 | 0.06 | 0.04 | 0.04 | 0.06 | 0.07 | 0.06 |
| Microcystis | 0.04 | 0.03 | 0.03 | 0.13 | 0.04 | 0.09 | 0.08 | 0.09 | 0.03 | 0.05 | 0.06 | 0.03 | 0.02 | 0.03 | 0.06 | 0.05 |
| Synechococcus | 5.84 | 10.91 | 11.09 | 32.86 | 7.09 | 11.20 | 4.51 | 3.50 | 6.33 | 7.28 | 5.65 | 5.36 | 5.58 | 11.83 | 31.75 | 8.07 |
| Synechocystis | 0.05 | 0.09 | 0.03 | 0.09 | 0.05 | 0.09 | 0.11 | 0.14 | 0.05 | 0.09 | 0.06 | 0.05 | 0.07 | 0.05 | 0.06 | 0.09 |
| Thermosynechococcus | 0.04 | 0.06 | 0.03 | 0.09 | 0.05 | 0.08 | 0.07 | 0.08 | 0.03 | 0.06 | 0.04 | 0.04 | 0.04 | 0.05 | 0.10 | 0.07 |
| unclassified (derived from Oscillatoriales) | Trichodesmium | 0.10 | 0.13 | 0.10 | 0.20 | 0.12 | 0.17 | 0.14 | 0.18 | 0.08 | 0.15 | 0.14 | 0.09 | 0.11 | 0.09 | 0.08 | 0.13 |
| Deferribacteres | Deferribacteres (class) | Deferribacteraceae | Denitrovibrio | 0.04 | 0.05 | 0.04 | 0.02 | 0.05 | 0.05 | 0.06 | 0.07 | 0.03 | 0.04 | 0.04 | 0.03 | 0.04 | 0.04 | 0.03 | 0.05 |
| Deinococcus-Thermus | Deinococci | Deinococcaceae | Deinococcus | 0.05 | 0.04 | 0.04 | 0.08 | 0.04 | 0.09 | 0.11 | 0.14 | 0.04 | 0.07 | 0.04 | 0.03 | 0.05 | 0.05 | 0.04 | 0.08 |
| Thermaceae | Meiothermus | 0.05 | 0.06 | 0.04 | 0.07 | 0.06 | 0.12 | 0.13 | 0.17 | 0.04 | 0.08 | 0.05 | 0.03 | 0.05 | 0.07 | 0.06 | 0.09 |
| Thermus | 0.02 | 0.03 | 0.02 | 0.03 | 0.04 | 0.03 | 0.06 | 0.09 | 0.02 | 0.03 | 0.02 | 0.02 | 0.04 | 0.03 | 0.02 | 0.05 |
| Dictyoglomi | Dictyoglomia | Dictyoglomaceae | Dictyoglomus | 0.02 | 0.03 | 0.02 | 0.03 | 0.04 | 0.05 | 0.04 | 0.05 | 0.02 | 0.03 | 0.04 | 0.02 | 0.03 | 0.05 | 0.04 | 0.03 |
| Elusimicrobia | Elusimicrobia (class) | Elusimicrobiaceae | Elusimicrobium | 0.01 | 0.01 | 0.01 | 0.00 | 0.02 | 0.02 | 0.02 | 0.02 | 0.01 | 0.01 | 0.01 | 0.01 | 0.01 | 0.01 | 0.01 | 0.01 |
| Firmicutes | Bacilli | Alicyclobacillaceae | Alicyclobacillus | 0.02 | 0.02 | 0.01 | 0.03 | 0.02 | 0.06 | 0.04 | 0.06 | 0.01 | 0.03 | 0.02 | 0.02 | 0.02 | 0.02 | 0.02 | 0.03 |
| Bacillaceae | Anoxybacillus | 0.01 | 0.02 | 0.01 | 0.03 | 0.03 | 0.03 | 0.03 | 0.04 | 0.02 | 0.02 | 0.03 | 0.01 | 0.02 | 0.02 | 0.01 | 0.02 |
| Bacillus | 0.19 | 0.23 | 0.17 | 0.41 | 0.23 | 0.34 | 0.38 | 0.43 | 0.17 | 0.29 | 0.21 | 0.13 | 0.20 | 0.26 | 0.25 | 0.24 |
| Geobacillus | 0.05 | 0.05 | 0.04 | 0.07 | 0.06 | 0.07 | 0.10 | 0.11 | 0.03 | 0.06 | 0.04 | 0.04 | 0.05 | 0.05 | 0.06 | 0.06 |
| Lysinibacillus | 0.00 | 0.00 | 0.00 | 0.00 | 0.00 | 0.00 | 0.00 | 0.00 | 0.00 | 0.00 | 0.00 | 0.00 | 0.00 | 0.00 | 0.00 | 0.00 |
| Marinococcus | 0.00 | 0.00 | 0.00 | 0.00 | 0.00 | 0.00 | 0.00 | 0.00 | 0.00 | 0.00 | 0.00 | 0.00 | 0.00 | 0.00 | 0.00 | 0.00 |
| Oceanobacillus | 0.03 | 0.03 | 0.02 | 0.03 | 0.03 | 0.04 | 0.04 | 0.05 | 0.02 | 0.03 | 0.03 | 0.02 | 0.03 | 0.03 | 0.03 | 0.03 |
| Enterococcaceae | Enterococcus | 0.02 | 0.01 | 0.01 | 0.01 | 0.02 | 0.02 | 0.02 | 0.02 | 0.01 | 0.01 | 0.01 | 0.01 | 0.01 | 0.01 | 0.02 | 0.01 |
| Tetragenococcus | 0.00 | 0.00 | 0.00 | 0.00 | 0.00 | 0.00 | 0.00 | 0.00 | 0.00 | 0.00 | 0.00 | 0.00 | 0.00 | 0.00 | 0.00 | 0.00 |
| Lactobacillaceae | Lactobacillus | 0.04 | 0.04 | 0.04 | 0.03 | 0.05 | 0.04 | 0.07 | 0.07 | 0.03 | 0.04 | 0.04 | 0.04 | 0.04 | 0.05 | 0.05 | 0.04 |
| Pediococcus | 0.01 | 0.00 | 0.00 | 0.01 | 0.01 | 0.01 | 0.01 | 0.01 | 0.00 | 0.01 | 0.00 | 0.00 | 0.00 | 0.00 | 0.00 | 0.00 |
| Leuconostocaceae | Leuconostoc | 0.00 | 0.00 | 0.00 | 0.00 | 0.00 | 0.00 | 0.00 | 0.01 | 0.00 | 0.00 | 0.00 | 0.00 | 0.00 | 0.00 | 0.01 | 0.00 |
| Oenococcus | 0.00 | 0.01 | 0.00 | 0.01 | 0.00 | 0.00 | 0.01 | 0.01 | 0.00 | 0.01 | 0.01 | 0.01 | 0.00 | 0.00 | 0.00 | 0.00 |
| Listeriaceae | Listeria | 0.02 | 0.02 | 0.02 | 0.02 | 0.02 | 0.02 | 0.05 | 0.04 | 0.02 | 0.03 | 0.02 | 0.02 | 0.02 | 0.02 | 0.03 | 0.02 |
| Paenibacillaceae | Paenibacillus | 0.01 | 0.01 | 0.01 | 0.01 | 0.01 | 0.01 | 0.02 | 0.02 | 0.01 | 0.01 | 0.01 | 0.01 | 0.01 | 0.01 | 0.01 | 0.01 |
| Staphylococcaceae | Macrococcus | 0.00 | 0.00 | 0.00 | 0.00 | 0.00 | 0.00 | 0.00 | 0.00 | 0.00 | 0.00 | 0.00 | 0.00 | 0.00 | 0.00 | 0.00 | 0.00 |
| Staphylococcus | 0.06 | 0.04 | 0.05 | 0.74 | 0.06 | 0.10 | 0.05 | 0.06 | 0.07 | 0.05 | 0.05 | 0.09 | 0.04 | 0.05 | 0.06 | 0.03 |
| Streptococcaceae | Lactococcus | 0.01 | 0.01 | 0.01 | 0.02 | 0.01 | 0.02 | 0.01 | 0.02 | 0.01 | 0.01 | 0.01 | 0.01 | 0.01 | 0.01 | 0.00 | 0.01 |
| Streptococcus | 0.05 | 0.04 | 0.05 | 0.10 | 0.06 | 0.07 | 0.06 | 0.08 | 0.03 | 0.05 | 0.04 | 0.04 | 0.04 | 0.05 | 0.08 | 0.04 |
| unclassified (derived from Bacillales) | Exiguobacterium | 0.05 | 0.01 | 0.02 | 0.55 | 0.02 | 0.02 | 0.03 | 0.08 | 0.03 | 0.02 | 0.01 | 0.00 | 0.05 | 0.02 | 0.01 | 0.02 |
| Clostridia | Clostridiaceae | Alkaliphilus | 0.03 | 0.04 | 0.03 | 0.03 | 0.03 | 0.06 | 0.06 | 0.08 | 0.03 | 0.05 | 0.03 | 0.03 | 0.04 | 0.04 | 0.04 | 0.05 |
| Clostridium | 0.16 | 0.22 | 0.20 | 0.26 | 0.25 | 0.23 | 0.30 | 0.36 | 0.15 | 0.20 | 0.18 | 0.13 | 0.22 | 0.24 | 0.22 | 0.19 |
| Clostridiales Family XI. Incertae Sedis | Finegoldia | 0.00 | 0.00 | 0.00 | 0.00 | 0.00 | 0.00 | 0.00 | 0.00 | 0.00 | 0.00 | 0.00 | 0.00 | 0.00 | 0.00 | 0.00 | 0.00 |
| Clostridiales Family XVIII. Incertae Sedis | Symbiobacterium | 0.03 | 0.03 | 0.02 | 0.05 | 0.03 | 0.04 | 0.10 | 0.13 | 0.03 | 0.05 | 0.03 | 0.02 | 0.03 | 0.03 | 0.03 | 0.06 |
| Eubacteriaceae | Eubacterium | 0.01 | 0.01 | 0.01 | 0.02 | 0.01 | 0.03 | 0.02 | 0.02 | 0.01 | 0.01 | 0.01 | 0.02 | 0.01 | 0.02 | 0.01 | 0.01 |
| Halanaerobiaceae | Halothermothrix | 0.03 | 0.04 | 0.03 | 0.06 | 0.03 | 0.04 | 0.06 | 0.07 | 0.02 | 0.04 | 0.03 | 0.02 | 0.03 | 0.04 | 0.04 | 0.04 |
| Heliobacteriaceae | Heliobacterium | 0.01 | 0.02 | 0.02 | 0.03 | 0.02 | 0.04 | 0.04 | 0.06 | 0.01 | 0.03 | 0.02 | 0.01 | 0.02 | 0.03 | 0.03 | 0.03 |
| Natranaerobiaceae | Natranaerobius | 0.02 | 0.02 | 0.01 | 0.02 | 0.03 | 0.03 | 0.03 | 0.03 | 0.01 | 0.02 | 0.02 | 0.02 | 0.02 | 0.02 | 0.02 | 0.02 |
| Peptococcaceae | Desulfitobacterium | 0.02 | 0.03 | 0.02 | 0.02 | 0.03 | 0.06 | 0.06 | 0.09 | 0.02 | 0.04 | 0.03 | 0.03 | 0.02 | 0.04 | 0.05 | 0.04 |
| Desulfotomaculum | 0.03 | 0.04 | 0.03 | 0.06 | 0.04 | 0.07 | 0.08 | 0.12 | 0.03 | 0.06 | 0.04 | 0.03 | 0.03 | 0.06 | 0.06 | 0.06 |
| Pelotomaculum | 0.02 | 0.02 | 0.02 | 0.03 | 0.02 | 0.02 | 0.06 | 0.08 | 0.01 | 0.03 | 0.02 | 0.01 | 0.01 | 0.03 | 0.02 | 0.03 |
| Peptostreptococcaceae | unclassified (derived from Peptostreptococcaceae) | 0.01 | 0.02 | 0.02 | 0.02 | 0.02 | 0.03 | 0.03 | 0.03 | 0.02 | 0.02 | 0.03 | 0.01 | 0.02 | 0.03 | 0.03 | 0.02 |
| Syntrophomonadaceae | Syntrophomonas | 0.01 | 0.03 | 0.02 | 0.01 | 0.03 | 0.02 | 0.04 | 0.05 | 0.02 | 0.02 | 0.02 | 0.01 | 0.02 | 0.03 | 0.03 | 0.03 |
| Thermoanaerobacteraceae | Caldanaerobacter | 0.04 | 0.05 | 0.03 | 0.02 | 0.03 | 0.03 | 0.06 | 0.08 | 0.03 | 0.04 | 0.03 | 0.02 | 0.04 | 0.04 | 0.04 | 0.04 |
| Carboxydothermus | 0.02 | 0.03 | 0.03 | 0.03 | 0.03 | 0.04 | 0.07 | 0.08 | 0.03 | 0.04 | 0.03 | 0.01 | 0.02 | 0.04 | 0.03 | 0.05 |
| Moorella | 0.02 | 0.03 | 0.02 | 0.06 | 0.03 | 0.04 | 0.06 | 0.10 | 0.02 | 0.04 | 0.01 | 0.01 | 0.02 | 0.02 | 0.02 | 0.04 |
| Thermoanaerobacter | 0.03 | 0.03 | 0.03 | 0.06 | 0.04 | 0.04 | 0.05 | 0.06 | 0.02 | 0.03 | 0.02 | 0.03 | 0.02 | 0.05 | 0.03 | 0.03 |
| Thermoanaerobacterales Family III. Incertae Sedis | Caldicellulosiruptor | 0.02 | 0.03 | 0.03 | 0.01 | 0.03 | 0.03 | 0.04 | 0.06 | 0.02 | 0.03 | 0.02 | 0.01 | 0.02 | 0.03 | 0.01 | 0.03 |
| Thermodesulfobiaceae | Coprothermobacter | 0.01 | 0.01 | 0.01 | 0.01 | 0.01 | 0.01 | 0.01 | 0.01 | 0.01 | 0.01 | 0.01 | 0.01 | 0.00 | 0.01 | 0.00 | 0.01 |
| Erysipelotrichi | Erysipelotrichaceae | Holdemania | 0.01 | 0.01 | 0.01 | 0.02 | 0.01 | 0.02 | 0.01 | 0.01 | 0.01 | 0.01 | 0.01 | 0.00 | 0.01 | 0.02 | 0.01 | 0.01 |
| Negativicutes | Veillonellaceae | Veillonella | 0.01 | 0.01 | 0.02 | 0.02 | 0.01 | 0.02 | 0.02 | 0.02 | 0.01 | 0.01 | 0.01 | 0.01 | 0.01 | 0.01 | 0.02 | 0.01 |
| Fusobacteria | Fusobacteriia | Fusobacteriaceae | Fusobacterium | 0.03 | 0.03 | 0.02 | 0.01 | 0.02 | 0.05 | 0.04 | 0.03 | 0.02 | 0.03 | 0.03 | 0.01 | 0.04 | 0.03 | 0.03 | 0.02 |
| Leptotrichiaceae | Leptotrichia | 0.01 | 0.01 | 0.01 | 0.00 | 0.02 | 0.01 | 0.01 | 0.02 | 0.01 | 0.01 | 0.01 | 0.01 | 0.01 | 0.01 | 0.01 | 0.01 |
| Sebaldella | 0.02 | 0.02 | 0.02 | 0.01 | 0.02 | 0.02 | 0.03 | 0.03 | 0.01 | 0.02 | 0.02 | 0.01 | 0.02 | 0.02 | 0.01 | 0.02 |
| Streptobacillus | 0.00 | 0.01 | 0.01 | 0.01 | 0.01 | 0.02 | 0.01 | 0.01 | 0.01 | 0.01 | 0.01 | 0.01 | 0.01 | 0.01 | 0.00 | 0.01 |
| Planctomycetes | Planctomycetia | Planctomycetaceae | Blastopirellula | 0.26 | 0.12 | 0.12 | 1.47 | 0.10 | 1.18 | 1.51 | 5.91 | 0.18 | 0.99 | 0.18 | 0.07 | 0.09 | 0.29 | 0.26 | 1.23 |
| Planctomyces | 0.12 | 0.06 | 0.06 | 0.44 | 0.06 | 0.41 | 0.65 | 2.06 | 0.07 | 0.37 | 0.09 | 0.05 | 0.06 | 0.12 | 0.10 | 0.50 |
| Rhodopirellula | 0.40 | 0.23 | 0.23 | 2.51 | 0.18 | 1.87 | 2.68 | 10.32 | 0.32 | 1.74 | 0.31 | 0.14 | 0.16 | 0.48 | 0.35 | 2.19 |
| Proteobacteria | Alphaproteobacteria | Acetobacteraceae | Acidiphilium | 0.18 | 0.17 | 0.10 | 0.09 | 0.20 | 0.14 | 0.19 | 0.15 | 0.10 | 0.14 | 0.15 | 0.13 | 0.22 | 0.14 | 0.07 | 0.18 |
| Gluconacetobacter | 0.00 | 0.00 | 0.00 | 0.00 | 0.00 | 0.00 | 0.00 | 0.00 | 0.00 | 0.00 | 0.00 | 0.00 | 0.00 | 0.00 | 0.00 | 0.00 |
| Gluconobacter | 0.07 | 0.07 | 0.04 | 0.02 | 0.08 | 0.06 | 0.07 | 0.06 | 0.04 | 0.05 | 0.06 | 0.05 | 0.08 | 0.06 | 0.03 | 0.07 |
| Granulibacter | 0.12 | 0.10 | 0.06 | 0.05 | 0.13 | 0.10 | 0.11 | 0.09 | 0.06 | 0.08 | 0.11 | 0.06 | 0.14 | 0.07 | 0.04 | 0.12 |
| Anaplasmataceae | Anaplasma | 0.01 | 0.02 | 0.01 | 0.01 | 0.01 | 0.01 | 0.01 | 0.01 | 0.01 | 0.01 | 0.02 | 0.01 | 0.02 | 0.02 | 0.00 | 0.01 |
| Ehrlichia | 0.03 | 0.04 | 0.03 | 0.00 | 0.04 | 0.02 | 0.02 | 0.02 | 0.02 | 0.02 | 0.03 | 0.02 | 0.03 | 0.04 | 0.01 | 0.02 |
| Neorickettsia | 0.01 | 0.01 | 0.01 | 0.00 | 0.01 | 0.00 | 0.01 | 0.01 | 0.01 | 0.01 | 0.01 | 0.01 | 0.01 | 0.01 | 0.00 | 0.00 |
| Wolbachia | 0.06 | 0.10 | 0.07 | 0.01 | 0.09 | 0.04 | 0.04 | 0.04 | 0.04 | 0.04 | 0.07 | 0.07 | 0.09 | 0.08 | 0.04 | 0.05 |
| Aurantimonadaceae | Aurantimonas | 0.22 | 0.18 | 0.12 | 0.17 | 0.19 | 0.24 | 0.23 | 0.28 | 0.12 | 0.19 | 0.23 | 0.12 | 0.23 | 0.18 | 0.07 | 0.23 |
| Bartonellaceae | Bartonella | 0.09 | 0.09 | 0.08 | 0.04 | 0.10 | 0.07 | 0.06 | 0.06 | 0.06 | 0.06 | 0.08 | 0.06 | 0.12 | 0.08 | 0.04 | 0.07 |
| Beijerinckiaceae | Beijerinckia | 0.00 | 0.00 | 0.00 | 0.00 | 0.00 | 0.00 | 0.00 | 0.00 | 0.00 | 0.00 | 0.00 | 0.00 | 0.00 | 0.00 | 0.00 | 0.00 |
| Methylocella | 0.08 | 0.09 | 0.05 | 0.11 | 0.08 | 0.09 | 0.10 | 0.10 | 0.05 | 0.07 | 0.09 | 0.04 | 0.10 | 0.08 | 0.04 | 0.09 |
| Bradyrhizobiaceae | Bradyrhizobium | 0.40 | 0.43 | 0.30 | 0.37 | 0.44 | 0.59 | 0.69 | 0.78 | 0.28 | 0.46 | 0.37 | 0.26 | 0.50 | 0.39 | 0.26 | 0.59 |
| Nitrobacter | 0.13 | 0.13 | 0.09 | 0.12 | 0.14 | 0.18 | 0.17 | 0.23 | 0.09 | 0.14 | 0.14 | 0.08 | 0.15 | 0.12 | 0.08 | 0.16 |
| Oligotropha | 0.08 | 0.07 | 0.05 | 0.08 | 0.08 | 0.08 | 0.09 | 0.09 | 0.05 | 0.06 | 0.06 | 0.05 | 0.10 | 0.07 | 0.04 | 0.08 |
| Rhodopseudomonas | 0.38 | 0.38 | 0.27 | 0.38 | 0.42 | 0.47 | 0.58 | 0.58 | 0.28 | 0.41 | 0.35 | 0.21 | 0.49 | 0.34 | 0.24 | 0.53 |
| Brucellaceae | Brucella | 0.31 | 0.30 | 0.21 | 0.24 | 0.28 | 0.32 | 0.33 | 0.47 | 0.19 | 0.27 | 0.25 | 0.16 | 0.38 | 0.22 | 0.13 | 0.38 |
| Ochrobactrum | 0.01 | 0.00 | 0.00 | 0.02 | 0.01 | 0.00 | 0.01 | 0.01 | 0.00 | 0.01 | 0.01 | 0.01 | 0.00 | 0.01 | 0.00 | 0.01 |
| Caulobacteraceae | Caulobacter | 0.44 | 0.34 | 0.21 | 0.26 | 0.29 | 0.32 | 0.40 | 0.35 | 0.20 | 0.32 | 0.32 | 0.19 | 0.45 | 0.29 | 0.16 | 0.38 |
| Phenylobacterium | 0.01 | 0.00 | 0.00 | 0.00 | 0.00 | 0.00 | 0.00 | 0.01 | 0.00 | 0.01 | 0.00 | 0.00 | 0.00 | 0.00 | 0.00 | 0.01 |
| Erythrobacteraceae | Erythrobacter | 0.51 | 0.31 | 0.28 | 0.59 | 0.31 | 0.55 | 0.57 | 0.50 | 0.25 | 0.57 | 0.49 | 0.23 | 0.43 | 0.31 | 0.34 | 0.52 |
| Hyphomonadaceae | Hyphomonas | 0.32 | 0.21 | 0.15 | 0.29 | 0.31 | 0.36 | 0.56 | 0.36 | 0.18 | 0.37 | 0.39 | 0.19 | 0.39 | 0.19 | 0.19 | 0.83 |
| Maricaulis | 0.22 | 0.18 | 0.14 | 0.14 | 0.21 | 0.26 | 0.33 | 0.30 | 0.14 | 0.23 | 0.16 | 0.17 | 0.24 | 0.18 | 0.09 | 0.29 |
| Oceanicaulis | 0.16 | 0.13 | 0.08 | 0.08 | 0.15 | 0.17 | 0.19 | 0.17 | 0.09 | 0.14 | 0.12 | 0.09 | 0.17 | 0.12 | 0.09 | 0.17 |
| Methylobacteriaceae | Methylobacterium | 0.23 | 0.19 | 0.15 | 0.33 | 0.21 | 0.31 | 0.37 | 0.43 | 0.15 | 0.24 | 0.25 | 0.15 | 0.29 | 0.23 | 0.12 | 0.31 |
| Parvularculaceae | Parvularcula | 0.12 | 0.10 | 0.08 | 0.07 | 0.13 | 0.18 | 0.15 | 0.14 | 0.07 | 0.13 | 0.12 | 0.05 | 0.15 | 0.11 | 0.05 | 0.14 |
| Phyllobacteriaceae | Chelativorans | 0.21 | 0.19 | 0.14 | 0.21 | 0.20 | 0.24 | 0.26 | 0.34 | 0.13 | 0.21 | 0.19 | 0.10 | 0.23 | 0.17 | 0.10 | 0.27 |
| Mesorhizobium | 0.32 | 0.32 | 0.22 | 0.29 | 0.35 | 0.38 | 0.46 | 0.59 | 0.22 | 0.38 | 0.32 | 0.17 | 0.36 | 0.28 | 0.14 | 0.46 |
| Parvibaculum | 0.79 | 0.65 | 0.43 | 0.26 | 0.80 | 0.54 | 0.77 | 0.57 | 0.51 | 0.56 | 0.63 | 0.36 | 1.11 | 0.59 | 0.21 | 0.74 |
| Rhizobiaceae | Agrobacterium | 0.27 | 0.25 | 0.18 | 0.26 | 0.27 | 0.23 | 0.22 | 0.28 | 0.15 | 0.19 | 0.28 | 0.16 | 0.29 | 0.24 | 0.11 | 0.27 |
| Rhizobium | 0.26 | 0.22 | 0.18 | 0.30 | 0.24 | 0.34 | 0.32 | 0.46 | 0.16 | 0.26 | 0.24 | 0.14 | 0.26 | 0.22 | 0.12 | 0.31 |
| Sinorhizobium | 0.36 | 0.33 | 0.23 | 0.32 | 0.34 | 0.43 | 0.43 | 0.63 | 0.23 | 0.34 | 0.28 | 0.15 | 0.39 | 0.24 | 0.15 | 0.45 |
| Rhodobacteraceae | Dinoroseobacter | 0.47 | 0.55 | 0.52 | 0.43 | 0.61 | 0.98 | 0.77 | 0.81 | 0.42 | 0.67 | 0.56 | 0.28 | 0.57 | 0.55 | 0.33 | 0.85 |
| Loktanella | 0.24 | 0.27 | 0.24 | 0.27 | 0.34 | 0.59 | 0.34 | 0.29 | 0.22 | 0.29 | 0.29 | 0.18 | 0.30 | 0.35 | 0.23 | 0.35 |
| Maritimibacter | 0.29 | 0.28 | 0.27 | 0.39 | 0.35 | 0.64 | 0.41 | 0.42 | 0.24 | 0.37 | 0.33 | 0.20 | 0.31 | 0.31 | 0.27 | 0.44 |
| Oceanicola | 0.27 | 0.26 | 0.29 | 0.32 | 0.31 | 0.57 | 0.38 | 0.37 | 0.21 | 0.36 | 0.31 | 0.23 | 0.28 | 0.30 | 0.30 | 0.38 |
| Paracoccus | 0.23 | 0.17 | 0.15 | 0.21 | 0.20 | 0.29 | 0.25 | 0.28 | 0.12 | 0.21 | 0.18 | 0.15 | 0.21 | 0.17 | 0.15 | 0.28 |
| Rhodobacter | 0.39 | 0.42 | 0.33 | 0.41 | 0.41 | 0.66 | 0.54 | 0.57 | 0.31 | 0.46 | 0.38 | 0.23 | 0.47 | 0.37 | 0.27 | 0.63 |
| Roseobacter | 1.22 | 1.22 | 1.26 | 1.40 | 1.20 | 2.70 | 1.69 | 1.84 | 0.89 | 1.90 | 1.29 | 0.69 | 1.32 | 1.17 | 1.30 | 1.84 |
| Roseovarius | 0.71 | 0.74 | 0.76 | 0.97 | 0.88 | 1.75 | 1.16 | 1.15 | 0.59 | 1.06 | 0.89 | 0.51 | 0.79 | 0.81 | 0.71 | 1.13 |
| Ruegeria | 1.49 | 1.60 | 1.84 | 1.31 | 1.59 | 4.27 | 2.47 | 2.57 | 1.27 | 2.74 | 1.76 | 2.08 | 1.70 | 1.52 | 1.36 | 2.83 |
| Sulfitobacter | 0.31 | 0.25 | 0.26 | 0.55 | 0.27 | 0.68 | 0.40 | 0.39 | 0.22 | 0.63 | 0.48 | 0.26 | 0.31 | 1.08 | 1.70 | 0.42 |
| Rhodospirillaceae | Magnetospirillum | 0.75 | 0.61 | 0.37 | 0.31 | 0.76 | 0.65 | 0.85 | 0.68 | 0.41 | 0.57 | 0.64 | 0.41 | 0.84 | 0.59 | 0.30 | 0.74 |
| Rhodospirillum | 0.76 | 0.65 | 0.38 | 0.35 | 0.86 | 0.62 | 0.88 | 0.66 | 0.42 | 0.61 | 0.72 | 0.39 | 0.90 | 0.58 | 0.26 | 0.79 |
| Rickettsiaceae | Orientia | 0.01 | 0.02 | 0.02 | 0.02 | 0.01 | 0.02 | 0.01 | 0.01 | 0.01 | 0.01 | 0.02 | 0.01 | 0.01 | 0.02 | 0.00 | 0.01 |
| Rickettsia | 0.12 | 0.20 | 0.12 | 0.04 | 0.17 | 0.09 | 0.09 | 0.07 | 0.09 | 0.08 | 0.13 | 0.08 | 0.16 | 0.13 | 0.05 | 0.10 |
| Sphingomonadaceae | Novosphingobium | 0.16 | 0.11 | 0.09 | 0.18 | 0.12 | 0.18 | 0.22 | 0.16 | 0.09 | 0.16 | 0.16 | 0.08 | 0.14 | 0.12 | 0.11 | 0.17 |
| Sphingomonas | 0.19 | 0.15 | 0.10 | 0.17 | 0.14 | 0.19 | 0.27 | 0.22 | 0.10 | 0.20 | 0.20 | 0.10 | 0.19 | 0.15 | 0.11 | 0.21 |
| Sphingopyxis | 0.15 | 0.11 | 0.08 | 0.12 | 0.11 | 0.15 | 0.18 | 0.16 | 0.09 | 0.15 | 0.13 | 0.08 | 0.16 | 0.10 | 0.08 | 0.16 |
| Zymomonas | 0.06 | 0.08 | 0.04 | 0.02 | 0.05 | 0.05 | 0.04 | 0.04 | 0.04 | 0.04 | 0.06 | 0.06 | 0.10 | 0.05 | 0.02 | 0.05 |
| unclassified (derived from Alphaproteobacteria) | Candidatus Pelagibacter | 18.85 | 27.15 | 22.36 | 0.54 | 26.17 | 3.32 | 3.25 | 0.44 | 12.16 | 6.62 | 17.51 | 12.77 | 24.31 | 17.74 | 5.72 | 9.28 |
| Xanthobacteraceae | Azorhizobium | 0.16 | 0.12 | 0.09 | 0.15 | 0.19 | 0.17 | 0.20 | 0.20 | 0.10 | 0.14 | 0.17 | 0.12 | 0.18 | 0.15 | 0.09 | 0.16 |
| Xanthobacter | 0.00 | 0.00 | 0.00 | 0.00 | 0.00 | 0.00 | 0.01 | 0.01 | 0.00 | 0.00 | 0.00 | 0.00 | 0.00 | 0.00 | 0.00 | 0.00 |
| Betaproteobacteria | Alcaligenaceae | Achromobacter | 0.00 | 0.00 | 0.00 | 0.00 | 0.00 | 0.00 | 0.00 | 0.00 | 0.00 | 0.00 | 0.00 | 0.00 | 0.00 | 0.00 | 0.00 | 0.00 |
| Bordetella | 0.18 | 0.18 | 0.13 | 0.14 | 0.20 | 0.21 | 0.29 | 0.29 | 0.10 | 0.17 | 0.16 | 0.13 | 0.18 | 0.15 | 0.11 | 0.23 |
| Burkholderiaceae | Burkholderia | 0.35 | 0.28 | 0.23 | 0.35 | 0.35 | 0.61 | 0.69 | 0.65 | 0.25 | 0.45 | 0.37 | 0.29 | 0.32 | 0.38 | 0.31 | 0.46 |
| Cupriavidus | 0.17 | 0.15 | 0.10 | 0.14 | 0.19 | 0.22 | 0.31 | 0.26 | 0.11 | 0.20 | 0.14 | 0.10 | 0.17 | 0.16 | 0.10 | 0.22 |
| Polynucleobacter | 0.03 | 0.05 | 0.04 | 0.04 | 0.06 | 0.04 | 0.05 | 0.05 | 0.03 | 0.03 | 0.04 | 0.03 | 0.04 | 0.04 | 0.02 | 0.05 |
| Ralstonia | 0.07 | 0.05 | 0.04 | 0.09 | 0.05 | 0.07 | 0.10 | 0.10 | 0.04 | 0.07 | 0.05 | 0.05 | 0.05 | 0.06 | 0.04 | 0.07 |
| Comamonadaceae | Acidovorax | 0.08 | 0.05 | 0.05 | 0.10 | 0.07 | 0.12 | 0.13 | 0.13 | 0.05 | 0.09 | 0.08 | 0.03 | 0.07 | 0.09 | 0.06 | 0.10 |
| Albidiferax | 0.06 | 0.05 | 0.04 | 0.06 | 0.05 | 0.08 | 0.12 | 0.12 | 0.04 | 0.08 | 0.05 | 0.04 | 0.06 | 0.06 | 0.05 | 0.09 |
| Comamonas | 0.00 | 0.00 | 0.00 | 0.00 | 0.00 | 0.00 | 0.00 | 0.00 | 0.00 | 0.00 | 0.00 | 0.00 | 0.00 | 0.00 | 0.00 | 0.00 |
| Delftia | 0.05 | 0.04 | 0.03 | 0.07 | 0.04 | 0.07 | 0.09 | 0.08 | 0.04 | 0.06 | 0.06 | 0.04 | 0.05 | 0.06 | 0.04 | 0.06 |
| Polaromonas | 0.09 | 0.08 | 0.06 | 0.11 | 0.08 | 0.12 | 0.16 | 0.16 | 0.06 | 0.10 | 0.07 | 0.04 | 0.08 | 0.09 | 0.07 | 0.12 |
| Verminephrobacter | 0.06 | 0.06 | 0.04 | 0.06 | 0.07 | 0.09 | 0.10 | 0.09 | 0.05 | 0.07 | 0.07 | 0.03 | 0.07 | 0.05 | 0.04 | 0.09 |
| Hydrogenophilaceae | Thiobacillus | 0.06 | 0.06 | 0.04 | 0.07 | 0.06 | 0.13 | 0.20 | 0.18 | 0.05 | 0.11 | 0.06 | 0.04 | 0.06 | 0.06 | 0.05 | 0.10 |
| Methylophilaceae | Methylobacillus | 0.08 | 0.06 | 0.06 | 0.05 | 0.06 | 0.10 | 0.11 | 0.09 | 0.05 | 0.08 | 0.07 | 0.07 | 0.07 | 0.07 | 0.06 | 0.08 |
| Neisseriaceae | Chromobacterium | 0.08 | 0.06 | 0.05 | 0.09 | 0.07 | 0.08 | 0.15 | 0.13 | 0.07 | 0.08 | 0.07 | 0.04 | 0.07 | 0.07 | 0.06 | 0.10 |
| Laribacter | 0.00 | 0.00 | 0.00 | 0.00 | 0.00 | 0.00 | 0.00 | 0.00 | 0.00 | 0.00 | 0.00 | 0.00 | 0.00 | 0.00 | 0.00 | 0.00 |
| Neisseria | 0.03 | 0.04 | 0.04 | 0.02 | 0.05 | 0.04 | 0.06 | 0.04 | 0.03 | 0.04 | 0.04 | 0.04 | 0.04 | 0.06 | 0.05 | 0.04 |
| Nitrosomonadaceae | Nitrosomonas | 0.09 | 0.07 | 0.07 | 0.08 | 0.08 | 0.12 | 0.16 | 0.17 | 0.06 | 0.10 | 0.08 | 0.05 | 0.09 | 0.09 | 0.06 | 0.11 |
| Nitrosospira | 0.06 | 0.04 | 0.03 | 0.06 | 0.04 | 0.09 | 0.13 | 0.12 | 0.05 | 0.07 | 0.04 | 0.02 | 0.04 | 0.05 | 0.05 | 0.08 |
| Oxalobacteraceae | Collimonas | 0.00 | 0.00 | 0.00 | 0.00 | 0.00 | 0.00 | 0.00 | 0.00 | 0.00 | 0.00 | 0.00 | 0.00 | 0.00 | 0.00 | 0.00 | 0.00 |
| Herminiimonas | 0.05 | 0.04 | 0.03 | 0.06 | 0.04 | 0.05 | 0.07 | 0.06 | 0.03 | 0.05 | 0.03 | 0.03 | 0.04 | 0.04 | 0.04 | 0.05 |
| Janthinobacterium | 0.05 | 0.04 | 0.03 | 0.05 | 0.04 | 0.07 | 0.08 | 0.08 | 0.04 | 0.06 | 0.05 | 0.04 | 0.04 | 0.05 | 0.03 | 0.05 |
| Rhodocyclaceae | Aromatoleum | 0.09 | 0.07 | 0.08 | 0.10 | 0.08 | 0.12 | 0.17 | 0.16 | 0.05 | 0.11 | 0.09 | 0.04 | 0.08 | 0.07 | 0.07 | 0.11 |
| Azoarcus | 0.09 | 0.06 | 0.06 | 0.11 | 0.07 | 0.13 | 0.19 | 0.17 | 0.06 | 0.11 | 0.07 | 0.07 | 0.07 | 0.10 | 0.05 | 0.12 |
| Dechloromonas | 0.07 | 0.06 | 0.04 | 0.07 | 0.07 | 0.15 | 0.18 | 0.16 | 0.06 | 0.11 | 0.05 | 0.04 | 0.06 | 0.06 | 0.05 | 0.11 |
| unclassified (derived from Burkholderiales) | Methylibium | 0.06 | 0.04 | 0.04 | 0.08 | 0.05 | 0.08 | 0.12 | 0.09 | 0.04 | 0.07 | 0.04 | 0.06 | 0.05 | 0.05 | 0.03 | 0.07 |
| Deltaproteobacteria | Bacteriovoracaceae | Bacteriovorax | 0.10 | 0.08 | 0.07 | 0.08 | 0.10 | 0.19 | 0.36 | 0.26 | 0.08 | 0.18 | 0.12 | 0.07 | 0.11 | 0.13 | 0.07 | 0.18 |
| Bdellovibrionaceae | Bdellovibrio | 0.07 | 0.07 | 0.05 | 0.07 | 0.07 | 0.10 | 0.22 | 0.20 | 0.05 | 0.11 | 0.07 | 0.06 | 0.09 | 0.08 | 0.07 | 0.12 |
| Desulfobacteraceae | Desulfatibacillum | 0.08 | 0.08 | 0.06 | 0.14 | 0.07 | 0.19 | 0.27 | 0.33 | 0.08 | 0.18 | 0.10 | 0.06 | 0.07 | 0.12 | 0.09 | 0.14 |
| Desulfobacterium | 0.00 | 0.00 | 0.00 | 0.00 | 0.00 | 0.00 | 0.00 | 0.00 | 0.00 | 0.00 | 0.00 | 0.00 | 0.00 | 0.00 | 0.00 | 0.00 |
| Desulfococcus | 0.06 | 0.05 | 0.04 | 0.09 | 0.06 | 0.11 | 0.20 | 0.27 | 0.04 | 0.13 | 0.05 | 0.03 | 0.05 | 0.07 | 0.05 | 0.10 |
| Desulfobulbaceae | Desulfotalea | 0.08 | 0.07 | 0.05 | 0.17 | 0.07 | 0.25 | 0.27 | 0.54 | 0.09 | 0.20 | 0.08 | 0.04 | 0.09 | 0.11 | 0.07 | 0.14 |
| Desulfohalobiaceae | Desulfohalobium | 0.03 | 0.02 | 0.02 | 0.05 | 0.02 | 0.06 | 0.06 | 0.09 | 0.02 | 0.04 | 0.02 | 0.02 | 0.02 | 0.04 | 0.03 | 0.04 |
| Desulfomicrobiaceae | Desulfomicrobium | 0.03 | 0.02 | 0.02 | 0.03 | 0.03 | 0.06 | 0.09 | 0.13 | 0.02 | 0.06 | 0.03 | 0.02 | 0.03 | 0.05 | 0.03 | 0.05 |
| Desulfovibrionaceae | Desulfovibrio | 0.08 | 0.07 | 0.07 | 0.13 | 0.08 | 0.18 | 0.22 | 0.33 | 0.07 | 0.14 | 0.09 | 0.05 | 0.08 | 0.10 | 0.08 | 0.14 |
| Lawsonia | 0.01 | 0.01 | 0.01 | 0.01 | 0.02 | 0.01 | 0.02 | 0.02 | 0.01 | 0.01 | 0.01 | 0.01 | 0.01 | 0.01 | 0.01 | 0.01 |
| Desulfuromonadaceae | Desulfuromonas | 0.09 | 0.08 | 0.06 | 0.10 | 0.07 | 0.19 | 0.26 | 0.30 | 0.06 | 0.15 | 0.11 | 0.06 | 0.07 | 0.09 | 0.07 | 0.14 |
| Geobacteraceae | Geobacter | 0.15 | 0.16 | 0.12 | 0.26 | 0.14 | 0.36 | 0.57 | 0.71 | 0.14 | 0.33 | 0.15 | 0.13 | 0.14 | 0.19 | 0.18 | 0.33 |
| Kofleriaceae | Haliangium | 0.12 | 0.10 | 0.08 | 0.19 | 0.11 | 0.34 | 0.57 | 0.57 | 0.10 | 0.27 | 0.12 | 0.09 | 0.09 | 0.14 | 0.10 | 0.31 |
| Myxococcaceae | Anaeromyxobacter | 0.10 | 0.07 | 0.07 | 0.18 | 0.09 | 0.26 | 0.45 | 0.57 | 0.09 | 0.21 | 0.09 | 0.05 | 0.08 | 0.14 | 0.09 | 0.27 |
| Myxococcus | 0.08 | 0.07 | 0.06 | 0.15 | 0.07 | 0.22 | 0.41 | 0.45 | 0.07 | 0.19 | 0.07 | 0.07 | 0.07 | 0.10 | 0.10 | 0.24 |
| Pelobacteraceae | Pelobacter | 0.08 | 0.08 | 0.06 | 0.13 | 0.09 | 0.18 | 0.33 | 0.40 | 0.08 | 0.17 | 0.07 | 0.04 | 0.08 | 0.12 | 0.06 | 0.19 |
| Polyangiaceae | Sorangium | 0.10 | 0.06 | 0.05 | 0.20 | 0.08 | 0.26 | 0.49 | 0.50 | 0.09 | 0.25 | 0.09 | 0.05 | 0.06 | 0.10 | 0.08 | 0.27 |
| Syntrophaceae | Syntrophus | 0.03 | 0.03 | 0.03 | 0.06 | 0.03 | 0.07 | 0.12 | 0.19 | 0.03 | 0.07 | 0.02 | 0.02 | 0.03 | 0.04 | 0.04 | 0.07 |
| Syntrophobacteraceae | Syntrophobacter | 0.04 | 0.03 | 0.03 | 0.06 | 0.03 | 0.12 | 0.16 | 0.27 | 0.04 | 0.10 | 0.05 | 0.02 | 0.03 | 0.06 | 0.04 | 0.09 |
| Epsilonproteobacteria | Campylobacteraceae | Arcobacter | 0.04 | 0.04 | 0.03 | 0.02 | 0.03 | 0.04 | 0.03 | 0.06 | 0.04 | 0.04 | 0.03 | 0.01 | 0.04 | 0.04 | 0.02 | 0.02 |
| Campylobacter | 0.07 | 0.07 | 0.06 | 0.05 | 0.08 | 0.07 | 0.07 | 0.07 | 0.04 | 0.05 | 0.07 | 0.05 | 0.06 | 0.08 | 0.07 | 0.05 |
| Sulfurospirillum | 0.02 | 0.03 | 0.02 | 0.02 | 0.02 | 0.02 | 0.02 | 0.02 | 0.02 | 0.02 | 0.02 | 0.01 | 0.02 | 0.02 | 0.02 | 0.02 |
| Helicobacteraceae | Helicobacter | 0.02 | 0.03 | 0.03 | 0.01 | 0.03 | 0.02 | 0.03 | 0.02 | 0.02 | 0.02 | 0.02 | 0.02 | 0.02 | 0.03 | 0.02 | 0.02 |
| Sulfurimonas | 0.02 | 0.02 | 0.02 | 0.02 | 0.02 | 0.02 | 0.03 | 0.02 | 0.02 | 0.02 | 0.01 | 0.02 | 0.02 | 0.02 | 0.02 | 0.02 |
| Wolinella | 0.02 | 0.02 | 0.01 | 0.02 | 0.01 | 0.02 | 0.03 | 0.02 | 0.01 | 0.02 | 0.01 | 0.01 | 0.02 | 0.02 | 0.02 | 0.02 |
| unclassified (derived from Epsilonproteobacteria) | Nitratiruptor | 0.02 | 0.03 | 0.02 | 0.00 | 0.03 | 0.02 | 0.04 | 0.04 | 0.02 | 0.02 | 0.02 | 0.01 | 0.02 | 0.02 | 0.03 | 0.02 |
| Sulfurovum | 0.03 | 0.03 | 0.03 | 0.04 | 0.02 | 0.04 | 0.07 | 0.07 | 0.03 | 0.05 | 0.03 | 0.01 | 0.03 | 0.03 | 0.04 | 0.04 |
| Gammaproteobacteria | Acidithiobacillaceae | Acidithiobacillus | 0.03 | 0.02 | 0.02 | 0.03 | 0.03 | 0.05 | 0.07 | 0.07 | 0.02 | 0.04 | 0.03 | 0.02 | 0.02 | 0.05 | 0.02 | 0.04 |
| Aeromonadaceae | Aeromonas | 0.16 | 0.14 | 0.13 | 0.09 | 0.13 | 0.19 | 0.26 | 0.18 | 0.19 | 0.18 | 0.17 | 0.11 | 0.16 | 0.13 | 0.06 | 0.21 |
| Alcanivoracaceae | Alcanivorax | 0.87 | 0.25 | 0.20 | 0.30 | 0.51 | 0.33 | 0.66 | 0.27 | 0.21 | 0.62 | 0.48 | 0.48 | 0.54 | 0.26 | 0.34 | 0.81 |
| Kangiella | 0.14 | 0.16 | 0.15 | 0.12 | 0.17 | 0.27 | 0.32 | 0.23 | 0.13 | 0.21 | 0.18 | 0.13 | 0.15 | 0.17 | 0.09 | 0.22 |
| Alteromonadaceae | Alteromonas | 15.70 | 8.39 | 15.87 | 2.41 | 12.37 | 2.10 | 3.24 | 0.31 | 4.07 | 9.89 | 18.26 | 36.24 | 12.14 | 10.15 | 5.79 | 10.61 |
| Marinobacter | 0.89 | 0.31 | 0.33 | 0.26 | 0.45 | 0.44 | 0.69 | 0.37 | 0.25 | 0.61 | 0.55 | 0.45 | 0.67 | 0.49 | 0.29 | 0.51 |
| Saccharophagus | 0.64 | 0.52 | 0.47 | 0.33 | 0.51 | 0.76 | 1.38 | 0.56 | 0.48 | 0.77 | 0.57 | 0.50 | 0.55 | 0.51 | 0.36 | 0.82 |
| Cardiobacteriaceae | Dichelobacter | 0.02 | 0.02 | 0.02 | 0.02 | 0.03 | 0.02 | 0.04 | 0.03 | 0.02 | 0.03 | 0.02 | 0.01 | 0.02 | 0.03 | 0.01 | 0.03 |
| Chromatiaceae | Nitrosococcus | 0.15 | 0.13 | 0.09 | 0.19 | 0.14 | 0.24 | 0.51 | 0.45 | 0.11 | 0.26 | 0.10 | 0.06 | 0.12 | 0.17 | 0.08 | 0.28 |
| Colwelliaceae | Colwellia | 0.54 | 0.49 | 0.57 | 0.13 | 0.39 | 0.66 | 0.80 | 0.50 | 0.95 | 0.82 | 0.69 | 0.54 | 0.45 | 0.59 | 0.20 | 0.63 |
| Coxiellaceae | Coxiella | 0.06 | 0.08 | 0.06 | 0.18 | 0.06 | 0.08 | 0.17 | 0.46 | 0.07 | 0.11 | 0.06 | 0.04 | 0.06 | 0.09 | 0.10 | 0.11 |
| Ectothiorhodospiraceae | Alkalilimnicola | 0.17 | 0.12 | 0.09 | 0.14 | 0.10 | 0.27 | 0.48 | 0.36 | 0.11 | 0.25 | 0.15 | 0.09 | 0.11 | 0.15 | 0.13 | 0.27 |
| Halorhodospira | 0.09 | 0.09 | 0.05 | 0.07 | 0.08 | 0.14 | 0.26 | 0.23 | 0.07 | 0.14 | 0.07 | 0.05 | 0.07 | 0.10 | 0.06 | 0.15 |
| Nitrococcus | 0.09 | 0.06 | 0.05 | 0.11 | 0.08 | 0.21 | 0.28 | 0.28 | 0.07 | 0.15 | 0.10 | 0.05 | 0.06 | 0.09 | 0.10 | 0.16 |
| Thioalkalivibrio | 0.19 | 0.14 | 0.11 | 0.23 | 0.14 | 0.38 | 0.69 | 0.51 | 0.16 | 0.35 | 0.14 | 0.08 | 0.13 | 0.18 | 0.15 | 0.36 |
| Enterobacteriaceae | Buchnera | 0.02 | 0.04 | 0.03 | 0.01 | 0.03 | 0.01 | 0.02 | 0.01 | 0.02 | 0.01 | 0.02 | 0.02 | 0.03 | 0.03 | 0.01 | 0.02 |
| Candidatus Blochmannia | 0.00 | 0.00 | 0.00 | 0.00 | 0.01 | 0.00 | 0.00 | 0.00 | 0.00 | 0.00 | 0.00 | 0.00 | 0.00 | 0.00 | 0.00 | 0.00 |
| Citrobacter | 0.02 | 0.02 | 0.01 | 0.04 | 0.02 | 0.03 | 0.03 | 0.02 | 0.02 | 0.02 | 0.02 | 0.01 | 0.02 | 0.03 | 0.01 | 0.02 |
| Enterobacter | 0.02 | 0.02 | 0.02 | 0.02 | 0.03 | 0.04 | 0.04 | 0.03 | 0.03 | 0.02 | 0.02 | 0.02 | 0.02 | 0.03 | 0.02 | 0.03 |
| Erwinia | 0.00 | 0.00 | 0.00 | 0.00 | 0.00 | 0.00 | 0.00 | 0.00 | 0.00 | 0.00 | 0.00 | 0.00 | 0.00 | 0.00 | 0.00 | 0.00 |
| Escherichia | 0.08 | 0.06 | 0.06 | 0.06 | 0.05 | 0.07 | 0.09 | 0.08 | 0.08 | 0.08 | 0.08 | 0.05 | 0.07 | 0.07 | 0.06 | 0.07 |
| Klebsiella | 0.05 | 0.03 | 0.02 | 0.05 | 0.03 | 0.05 | 0.05 | 0.05 | 0.03 | 0.04 | 0.04 | 0.03 | 0.03 | 0.03 | 0.03 | 0.04 |
| Pantoea | 0.00 | 0.00 | 0.00 | 0.00 | 0.00 | 0.00 | 0.00 | 0.00 | 0.00 | 0.00 | 0.00 | 0.00 | 0.00 | 0.00 | 0.00 | 0.00 |
| Pectobacterium | 0.04 | 0.03 | 0.03 | 0.03 | 0.03 | 0.07 | 0.07 | 0.06 | 0.04 | 0.05 | 0.04 | 0.04 | 0.04 | 0.04 | 0.03 | 0.04 |
| Photorhabdus | 0.06 | 0.06 | 0.05 | 0.04 | 0.06 | 0.06 | 0.10 | 0.07 | 0.06 | 0.07 | 0.07 | 0.06 | 0.06 | 0.06 | 0.03 | 0.06 |
| Proteus | 0.04 | 0.03 | 0.04 | 0.04 | 0.04 | 0.04 | 0.05 | 0.04 | 0.05 | 0.05 | 0.05 | 0.03 | 0.05 | 0.03 | 0.04 | 0.04 |
| Salmonella | 0.10 | 0.09 | 0.09 | 0.06 | 0.07 | 0.10 | 0.11 | 0.07 | 0.14 | 0.09 | 0.11 | 0.09 | 0.10 | 0.08 | 0.09 | 0.09 |
| Serratia | 0.06 | 0.04 | 0.04 | 0.04 | 0.05 | 0.10 | 0.10 | 0.08 | 0.06 | 0.07 | 0.07 | 0.05 | 0.05 | 0.07 | 0.04 | 0.07 |
| Shigella | 0.06 | 0.03 | 0.02 | 0.04 | 0.04 | 0.04 | 0.06 | 0.05 | 0.04 | 0.04 | 0.06 | 0.01 | 0.05 | 0.04 | 0.04 | 0.05 |
| Sodalis | 0.02 | 0.01 | 0.01 | 0.02 | 0.01 | 0.02 | 0.03 | 0.02 | 0.01 | 0.02 | 0.02 | 0.02 | 0.01 | 0.02 | 0.01 | 0.02 |
| Wigglesworthia | 0.00 | 0.01 | 0.01 | 0.00 | 0.01 | 0.00 | 0.00 | 0.00 | 0.00 | 0.00 | 0.00 | 0.01 | 0.00 | 0.00 | 0.00 | 0.00 |
| Yersinia | 0.13 | 0.10 | 0.10 | 0.10 | 0.10 | 0.18 | 0.16 | 0.14 | 0.13 | 0.13 | 0.14 | 0.12 | 0.12 | 0.14 | 0.08 | 0.13 |
| Francisellaceae | Francisella | 0.09 | 0.14 | 0.11 | 0.04 | 0.16 | 0.08 | 0.12 | 0.10 | 0.09 | 0.08 | 0.09 | 0.08 | 0.11 | 0.11 | 0.08 | 0.09 |
| Hahellaceae | Hahella | 0.41 | 0.37 | 0.38 | 0.20 | 0.35 | 0.52 | 0.80 | 0.51 | 0.34 | 0.49 | 0.34 | 0.24 | 0.35 | 0.40 | 0.20 | 0.52 |
| Halomonadaceae | Chromohalobacter | 1.11 | 0.26 | 0.24 | 0.27 | 0.27 | 0.28 | 0.39 | 0.27 | 0.20 | 0.48 | 0.70 | 0.21 | 0.27 | 0.24 | 0.61 | 0.37 |
| Idiomarinaceae | Idiomarina | 0.51 | 0.38 | 0.36 | 0.13 | 0.32 | 0.31 | 0.40 | 0.25 | 0.32 | 0.44 | 0.45 | 0.34 | 0.45 | 0.27 | 0.17 | 0.45 |
| Legionellaceae | Fluoribacter | 0.00 | 0.00 | 0.00 | 0.00 | 0.00 | 0.00 | 0.00 | 0.00 | 0.00 | 0.00 | 0.00 | 0.00 | 0.00 | 0.00 | 0.00 | 0.00 |
| Legionella | 0.11 | 0.14 | 0.11 | 0.13 | 0.13 | 0.19 | 0.23 | 0.42 | 0.09 | 0.19 | 0.12 | 0.09 | 0.11 | 0.13 | 0.10 | 0.15 |
| Methylococcaceae | Methylococcus | 0.14 | 0.13 | 0.11 | 0.11 | 0.14 | 0.23 | 0.43 | 0.37 | 0.12 | 0.24 | 0.15 | 0.11 | 0.12 | 0.13 | 0.09 | 0.25 |
| Moraxellaceae | Acinetobacter | 0.20 | 0.11 | 0.09 | 0.26 | 0.10 | 0.15 | 0.15 | 0.13 | 0.09 | 0.11 | 0.11 | 0.11 | 0.11 | 0.11 | 0.13 | 0.11 |
| Moraxella | 0.00 | 0.00 | 0.00 | 0.00 | 0.00 | 0.00 | 0.00 | 0.00 | 0.00 | 0.00 | 0.00 | 0.00 | 0.00 | 0.00 | 0.00 | 0.00 |
| Psychrobacter | 1.00 | 0.19 | 0.17 | 1.81 | 0.18 | 0.17 | 0.17 | 0.30 | 0.21 | 0.17 | 0.19 | 0.13 | 0.33 | 0.16 | 0.30 | 0.14 |
| Pasteurellaceae | Actinobacillus | 0.04 | 0.05 | 0.03 | 0.03 | 0.04 | 0.05 | 0.06 | 0.05 | 0.06 | 0.04 | 0.04 | 0.04 | 0.04 | 0.04 | 0.04 | 0.05 |
| Aggregatibacter | 0.00 | 0.00 | 0.00 | 0.00 | 0.01 | 0.00 | 0.01 | 0.01 | 0.00 | 0.01 | 0.01 | 0.01 | 0.00 | 0.01 | 0.00 | 0.00 |
| Basfia | 0.02 | 0.02 | 0.01 | 0.02 | 0.02 | 0.02 | 0.03 | 0.02 | 0.02 | 0.02 | 0.01 | 0.01 | 0.02 | 0.03 | 0.02 | 0.02 |
| Haemophilus | 0.09 | 0.08 | 0.06 | 0.06 | 0.08 | 0.10 | 0.09 | 0.08 | 0.06 | 0.07 | 0.07 | 0.08 | 0.07 | 0.06 | 0.08 | 0.07 |
| Histophilus | 0.01 | 0.01 | 0.01 | 0.00 | 0.01 | 0.02 | 0.01 | 0.01 | 0.01 | 0.01 | 0.01 | 0.01 | 0.01 | 0.01 | 0.01 | 0.01 |
| Mannheimia | 0.01 | 0.00 | 0.00 | 0.01 | 0.01 | 0.01 | 0.01 | 0.01 | 0.01 | 0.01 | 0.00 | 0.00 | 0.01 | 0.01 | 0.01 | 0.01 |
| Pasteurella | 0.03 | 0.04 | 0.03 | 0.04 | 0.04 | 0.03 | 0.03 | 0.03 | 0.03 | 0.03 | 0.02 | 0.02 | 0.04 | 0.04 | 0.02 | 0.03 |
| Piscirickettsiaceae | Thiomicrospira | 0.08 | 0.08 | 0.06 | 0.05 | 0.07 | 0.09 | 0.17 | 0.14 | 0.07 | 0.09 | 0.06 | 0.05 | 0.07 | 0.08 | 0.04 | 0.11 |
| Pseudoalteromonadaceae | Pseudoalteromonas | 6.38 | 4.34 | 5.47 | 0.64 | 4.68 | 1.76 | 2.40 | 0.88 | 5.18 | 4.85 | 4.53 | 6.31 | 5.61 | 3.28 | 1.38 | 4.53 |
| Pseudomonadaceae | Azotobacter | 0.14 | 0.08 | 0.07 | 0.11 | 0.09 | 0.14 | 0.20 | 0.13 | 0.07 | 0.13 | 0.11 | 0.06 | 0.09 | 0.11 | 0.09 | 0.14 |
| Cellvibrio | 0.33 | 0.23 | 0.21 | 0.19 | 0.27 | 0.41 | 0.67 | 0.28 | 0.22 | 0.37 | 0.29 | 0.18 | 0.25 | 0.28 | 0.24 | 0.38 |
| Pseudomonas | 1.82 | 1.12 | 0.91 | 1.35 | 1.22 | 1.47 | 2.26 | 1.70 | 0.97 | 1.56 | 1.40 | 1.12 | 1.14 | 1.34 | 1.28 | 1.61 |
| Psychromonadaceae | Psychromonas | 0.03 | 0.03 | 0.03 | 0.10 | 0.03 | 0.06 | 0.05 | 0.04 | 0.04 | 0.03 | 0.05 | 0.02 | 0.03 | 0.04 | 0.03 | 0.04 |
| Shewanellaceae | Shewanella | 1.44 | 1.11 | 1.21 | 0.68 | 1.13 | 1.44 | 1.83 | 1.26 | 1.95 | 1.69 | 1.49 | 1.53 | 1.37 | 1.24 | 0.72 | 1.51 |
| unclassified (derived from Gammaproteobacteria) | Candidatus Carsonella | 0.00 | 0.00 | 0.00 | 0.00 | 0.00 | 0.00 | 0.00 | 0.00 | 0.00 | 0.00 | 0.00 | 0.00 | 0.00 | 0.00 | 0.00 | 0.00 |
| Congregibacter | 0.85 | 0.77 | 0.76 | 1.65 | 0.85 | 1.86 | 2.78 | 1.26 | 0.78 | 1.63 | 0.81 | 0.47 | 0.59 | 1.08 | 1.55 | 1.56 |
| Reinekea | 0.22 | 0.21 | 0.18 | 0.10 | 0.26 | 0.29 | 0.37 | 0.21 | 0.21 | 0.24 | 0.23 | 0.14 | 0.21 | 0.24 | 0.13 | 0.24 |
| unclassified (derived from Gammaproteobacteria) | 0.03 | 0.04 | 0.03 | 0.01 | 0.04 | 0.02 | 0.04 | 0.04 | 0.02 | 0.03 | 0.03 | 0.02 | 0.03 | 0.03 | 0.02 | 0.03 |
| Vibrionaceae | Aliivibrio | 0.17 | 0.16 | 0.16 | 0.08 | 0.12 | 0.33 | 0.25 | 0.16 | 1.20 | 0.22 | 0.24 | 0.16 | 0.17 | 0.32 | 0.08 | 0.16 |
| Listonella | 0.00 | 0.00 | 0.00 | 0.00 | 0.00 | 0.00 | 0.00 | 0.00 | 0.01 | 0.00 | 0.00 | 0.00 | 0.00 | 0.00 | 0.00 | 0.00 |
| Photobacterium | 0.35 | 0.27 | 0.27 | 0.21 | 0.21 | 0.51 | 0.51 | 0.33 | 1.79 | 0.39 | 0.44 | 0.21 | 0.36 | 0.49 | 0.14 | 0.27 |
| Vibrio | 1.22 | 1.80 | 1.81 | 0.50 | 0.83 | 4.56 | 1.81 | 1.19 | 28.70 | 3.14 | 2.63 | 1.12 | 1.06 | 4.53 | 0.46 | 1.02 |
| Xanthomonadaceae | Stenotrophomonas | 0.08 | 0.05 | 0.04 | 0.08 | 0.05 | 0.13 | 0.16 | 0.15 | 0.05 | 0.10 | 0.06 | 0.04 | 0.05 | 0.07 | 0.07 | 0.10 |
| Xanthomonas | 0.15 | 0.14 | 0.11 | 0.15 | 0.12 | 0.27 | 0.37 | 0.32 | 0.10 | 0.21 | 0.14 | 0.10 | 0.11 | 0.14 | 0.13 | 0.23 |
| Xylella | 0.03 | 0.04 | 0.03 | 0.04 | 0.03 | 0.05 | 0.07 | 0.07 | 0.03 | 0.05 | 0.04 | 0.04 | 0.03 | 0.03 | 0.04 | 0.06 |
| unclassified (derived from Proteobacteria) | unclassified (derived from Proteobacteria) | Magnetococcus | 0.10 | 0.08 | 0.07 | 0.06 | 0.09 | 0.14 | 0.23 | 0.23 | 0.07 | 0.13 | 0.10 | 0.06 | 0.10 | 0.08 | 0.07 | 0.13 |
| unclassified (derived from Proteobacteria) | 0.00 | 0.00 | 0.00 | 0.01 | 0.00 | 0.00 | 0.00 | 0.00 | 0.00 | 0.00 | 0.00 | 0.00 | 0.00 | 0.00 | 0.00 | 0.00 |
| Spirochaetes | Spirochaetia | Leptospiraceae | Leptospira | 0.06 | 0.07 | 0.06 | 0.04 | 0.08 | 0.07 | 0.13 | 0.10 | 0.05 | 0.08 | 0.05 | 0.06 | 0.06 | 0.06 | 0.05 | 0.08 |
| Spirochaetaceae | Borrelia | 0.02 | 0.01 | 0.01 | 0.01 | 0.02 | 0.01 | 0.02 | 0.01 | 0.01 | 0.01 | 0.01 | 0.01 | 0.01 | 0.01 | 0.02 | 0.02 |
| Treponema | 0.02 | 0.02 | 0.02 | 0.02 | 0.01 | 0.03 | 0.05 | 0.05 | 0.01 | 0.02 | 0.02 | 0.03 | 0.02 | 0.02 | 0.02 | 0.03 |
| Synergistetes | Synergistia | Synergistaceae | Dethiosulfovibrio | 0.02 | 0.02 | 0.02 | 0.02 | 0.02 | 0.03 | 0.03 | 0.04 | 0.02 | 0.03 | 0.01 | 0.01 | 0.01 | 0.02 | 0.01 | 0.02 |
| Thermanaerovibrio | 0.01 | 0.01 | 0.01 | 0.02 | 0.01 | 0.01 | 0.02 | 0.03 | 0.01 | 0.02 | 0.01 | 0.00 | 0.01 | 0.01 | 0.02 | 0.02 |
| Tenericutes | Mollicutes | Acholeplasmataceae | Acholeplasma | 0.00 | 0.01 | 0.01 | 0.01 | 0.01 | 0.00 | 0.01 | 0.01 | 0.00 | 0.01 | 0.00 | 0.01 | 0.00 | 0.01 | 0.01 | 0.00 |
| Candidatus Phytoplasma | 0.00 | 0.01 | 0.01 | 0.01 | 0.01 | 0.01 | 0.01 | 0.01 | 0.00 | 0.01 | 0.01 | 0.00 | 0.01 | 0.01 | 0.00 | 0.00 |
| Entomoplasmataceae | Mesoplasma | 0.00 | 0.00 | 0.00 | 0.00 | 0.00 | 0.00 | 0.00 | 0.00 | 0.00 | 0.00 | 0.00 | 0.00 | 0.00 | 0.00 | 0.01 | 0.00 |
| Mycoplasmataceae | Mycoplasma | 0.03 | 0.04 | 0.04 | 0.03 | 0.04 | 0.03 | 0.02 | 0.02 | 0.02 | 0.02 | 0.02 | 0.02 | 0.03 | 0.03 | 0.04 | 0.02 |
| Ureaplasma | 0.00 | 0.00 | 0.00 | 0.00 | 0.00 | 0.00 | 0.00 | 0.00 | 0.00 | 0.00 | 0.00 | 0.00 | 0.00 | 0.00 | 0.00 | 0.00 |
| Spiroplasmataceae | Spiroplasma | 0.00 | 0.00 | 0.00 | 0.00 | 0.00 | 0.00 | 0.00 | 0.00 | 0.00 | 0.00 | 0.00 | 0.00 | 0.00 | 0.00 | 0.00 | 0.00 |
| Thermotogae | Thermotogae (class) | Thermotogaceae | Fervidobacterium | 0.01 | 0.01 | 0.01 | 0.02 | 0.01 | 0.02 | 0.02 | 0.02 | 0.01 | 0.02 | 0.01 | 0.01 | 0.02 | 0.01 | 0.02 | 0.01 |
| Petrotoga | 0.01 | 0.02 | 0.02 | 0.01 | 0.02 | 0.02 | 0.02 | 0.02 | 0.01 | 0.02 | 0.01 | 0.01 | 0.02 | 0.03 | 0.03 | 0.02 |
| Thermosipho | 0.03 | 0.04 | 0.04 | 0.03 | 0.04 | 0.03 | 0.04 | 0.04 | 0.02 | 0.03 | 0.03 | 0.03 | 0.04 | 0.04 | 0.03 | 0.03 |
| Thermotoga | 0.03 | 0.05 | 0.04 | 0.04 | 0.05 | 0.05 | 0.07 | 0.09 | 0.03 | 0.05 | 0.05 | 0.01 | 0.04 | 0.04 | 0.03 | 0.05 |
| unclassified (derived from Bacteria) | unclassified (derived from Bacteria) | unclassified (derived from Bacteria) | Thermobaculum | 0.03 | 0.03 | 0.03 | 0.06 | 0.03 | 0.05 | 0.09 | 0.11 | 0.03 | 0.06 | 0.04 | 0.03 | 0.03 | 0.05 | 0.05 | 0.05 |
| unclassified (derived from Bacteria) | 0.00 | 0.00 | 0.00 | 0.00 | 0.00 | 0.00 | 0.00 | 0.00 | 0.00 | 0.00 | 0.00 | 0.00 | 0.00 | 0.00 | 0.00 | 0.00 |
| Verrucomicrobia | Opitutae | Opitutaceae | Opitutus | 0.11 | 0.07 | 0.07 | 0.20 | 0.07 | 0.31 | 0.53 | 0.76 | 0.11 | 0.34 | 0.11 | 0.06 | 0.07 | 0.14 | 0.09 | 0.27 |
| unclassified (derived from Verrucomicrobia) | Methylacidiphilaceae | Methylacidiphilum | 0.02 | 0.02 | 0.02 | 0.07 | 0.02 | 0.06 | 0.10 | 0.15 | 0.02 | 0.05 | 0.02 | 0.01 | 0.02 | 0.03 | 0.02 | 0.05 |
| Verrucomicrobiae | Verrucomicrobiaceae | Akkermansia | 0.05 | 0.04 | 0.04 | 0.16 | 0.04 | 0.24 | 0.25 | 0.49 | 0.05 | 0.17 | 0.06 | 0.03 | 0.04 | 0.06 | 0.06 | 0.18 |
